# Supplementary material
Source: PubMed Central journal article supplement (PMC5303559)
Supplement: NIHMS820446-supplement-Supplemental_Figure_1.pdf [file NIHMS820446-supplement-Supplemental_Figure_1.pdf]

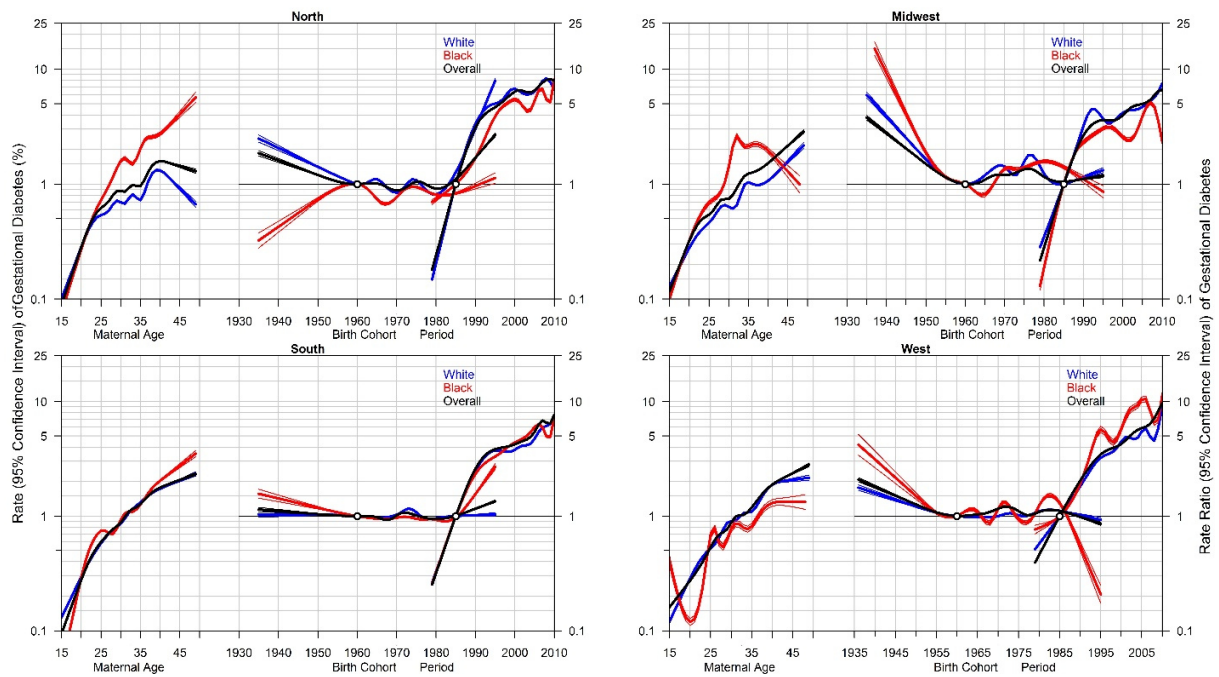

**Figure S1.** Trends in gestational diabetes in the United States by race and region, 1979-2010 Age-period-cohort effects for gestational diabetes stratified by race and region. Rates with 95% confidence intervals are shown on the left vertical axis for maternal age, and risk ratios with 95% confidence intervals on the right vertical axis for period (1980 as the reference period) and birth cohort (1960 as the reference maternal birth cohort): United States, 1979-2010
