# Supplementary material
Source: PubMed Central journal article supplement (PMC5303559)
Supplement: NIHMS820446-supplement-Supplemental_Tables_1_-_2.pdf [file NIHMS820446-supplement-Supplemental_Tables_1_-_2.pdf]

**Table S1A.** Gestational diabetes prevalence rates (%) among whites by maternal age, period, and maternal birth cohorts in the United States, 1979 to 2010

| Period<br>of birth | Maternal age (years) |       |       |       |       |       | Central birth<br>cohort |
|--------------------|----------------------|-------|-------|-------|-------|-------|-------------------------|
|                    | 15-19                | 20-24 | 25-29 | 30-34 | 35-39 | 40-44 |                         |
|                    |                      |       |       |       |       | 0.5   | 1937                    |
|                    |                      |       |       |       | 1.3   | 4.3   | 1942                    |
|                    |                      |       |       | 0.3   | 1.2   | 11.4  | 1947                    |
|                    |                      |       | 0.1   | 1.0   | 3.0   | 9.7   | 1952                    |
|                    |                      | 0.1   | 0.5   | 2.5   | 4.6   | 10.9  | 1957                    |
|                    | 0.2                  | 0.4   | 1.9   | 3.3   | 5.2   | 6.8   | 1962                    |
| 1980 ↗             | 0.1                  | 1.3   | 2.4   | 4.4   | 5.9   | 15.1  | 1967                    |
| 1985 ↗             | 0.9                  | 1.7   | 3.1   | 4.7   | 10.3  |       | 1972                    |
| 1990 ↗             | 0.4                  | 2.7   | 3.6   | 6.7   |       |       | 1977                    |
| 1995 ↗             | 0.5                  | 1.7   | 6.5   |       |       |       | 1982                    |
| 2000 ↗             | 1.4                  | 3.2   |       |       |       |       | 1987                    |
| 2005 ↗             | 2.8                  |       |       |       |       |       | 1992                    |
| 2010 ↗             |                      |       |       |       |       |       |                         |

**Table S1B.** Gestational diabetes prevalence rates (%) among blacks by maternal age, period, and maternal birth cohorts in the United States, 1979 to 2010

| Period<br>of birth | Maternal age (years) |       |       |       |       |       | Central birth<br>cohort |
|--------------------|----------------------|-------|-------|-------|-------|-------|-------------------------|
|                    | 15-19                | 20-24 | 25-29 | 30-34 | 35-39 | 40-44 |                         |
|                    |                      |       |       |       |       | 3.5   | 1937                    |
|                    |                      |       |       |       | 0.8   | 15.4  | 1942                    |
|                    |                      |       |       | 0.5   | 4.9   | 6.6   | 1947                    |
|                    |                      |       | 0.6   | 0.9   | 3.4   | 13.0  | 1952                    |
|                    |                      | 0.2   | 0.4   | 3.4   | 7.4   | 10.0  | 1957                    |
|                    | 0.0                  | 0.3   | 1.1   | 5.6   | 8.6   | 11.0  | 1962                    |
| 1980 ↗             | 0.2                  | 0.8   | 1.4   | 4.9   | 9.1   |       | 1967                    |
| 1985 ↗             | 0.3                  | 1.7   | 4.1   | 6.2   |       |       | 1972                    |
| 1990 ↗             | 1.0                  | 1.1   | 1.9   | 8.2   |       |       | 1977                    |
| 1995 ↗             | 0.7                  | 1.4   | 3.3   |       |       |       | 1982                    |
| 2000 ↗             | 0.8                  | 7.5   |       |       |       |       | 1987                    |
| 2005 ↗             | 0.3                  |       |       |       |       |       | 1992                    |
| 2010 ↗             |                      |       |       |       |       |       |                         |

**Table S2.** Age-period-cohort model based on weighted Poisson regression for gestational diabetes prevalence rates: United States, 1979 to 2010

| Model parameter        | Effect             | Gestational Diabetes |                   |                 |
|------------------------|--------------------|----------------------|-------------------|-----------------|
|                        |                    | Overall              | White             | Black           |
| Age-drift              | $\Delta^\dagger A$ | 1,152,500 (1)        | 608,819 (1)       | 128,379 (1)     |
| Age-cohort             | $P\ddagger A,C$    | 18,716 (5)           | 12,277 (5)        | 878 (5)         |
| Age-period-cohort      | $C\ddagger A,P$    | 107,638 (5)          | 79,940 (5)        | 13,045 (5)      |
| Age-period             | $P\ddagger A$      | -6,245 (-5)          | -5,950 (-5)       | -1,599 (-5)     |
| Age-drift              | $C\ddagger A$      | -120,109 (-5)        | -86,266 (-5)      | -12,324 (-5)    |
| Residual deviance (df) | Age                | 1,604,787 (1,080)    | 1,043,417 (1,073) | 382,616 (1,008) |

A, Age effect; P, Period effect; C, Cohort effect

$\dagger$ , Drift estimate;  $\ddagger$ , Curvature estimate
